# Supplementary material for: Persistent smoking after a cardiovascular event: A nationwide retrospective study in Korea
Source: PubMed Central journal article supplement (PMC5648241; doi:10.1371/journal.pone.0186872), 2017-10-19
Supplement: pone.0186872.s001.pdf [file pone.0186872.s001.pdf]

**sTable 1. The amount smoked before and after the cardiovascular event among persistent smokers (N=243)**

| Pre-diagnosis smoking amount (cigarettes/d) | Post-diagnosis smoking amount (cigarettes/d) |       |       |     |       |
|---------------------------------------------|----------------------------------------------|-------|-------|-----|-------|
|                                             | 0-9                                          | 10-19 | 20-39 | 40+ | Total |
| 0-9                                         | 19                                           | 13    | 2     | 0   | 34    |
| 10-19                                       | 23                                           | 64    | 22    | 0   | 109   |
| 20-39                                       | 4                                            | 39    | 48    | 4   | 95    |
| 40+                                         | 0                                            | 1     | 3     | 1   | 5     |
| Total                                       | 46                                           | 117   | 75    | 5   | 243   |

P<0.05 by Friedman test
